# Supplementary material for: Changes in postoperative opioid prescribing across three diverse healthcare systems, 2010–2020
Source: Frontiers journal article supplement (doi:10.3389/fdgth.2022.995497), 2022-12-06
Supplement: Table_1.pdf [file Table_1.pdf]

## Supplemental Material

**eTable 1: Type of surgical procedures included in the study with corresponding CCS procedure category**

| <b>Surgery types</b>                                   | <b>Multi-Level CCS - Procedures</b> |
|--------------------------------------------------------|-------------------------------------|
| Appendectomy                                           | 9.12                                |
| Coronary artery bypass graft (CABG)                    | 7.2                                 |
| Colorectal resection                                   | 9.1                                 |
| Distal radius fracture*                                | 14.3                                |
| Excision; lysis peritoneal adhesions                   | 9.22                                |
| Hysterectomy; abdominal and vaginal                    | 12.5                                |
| Inguinal and femoral hernia repair                     | 9.17                                |
| Knee replacement*                                      | 14.7                                |
| Oophorectomy; unilateral and bilateral                 | 12.1                                |
| Other hand*                                            | 14.15                               |
| Partial excision bone                                  | 14.1                                |
| Spinal fusion                                          | 14.11                               |
| Treatment; fracture or dislocation of hip and femur*   | 14.3                                |
| Treatment; fracture or dislocation of lower extremity* | 14.3                                |
| Cholecystectomy and common duct exploration            | 9.16                                |
| Laminectomy; excision intervertebral disc              | 1.3                                 |
| Mastectomy                                             | 3.3                                 |
| Open prostatectomy                                     | 11.2                                |
| Thoracotomy                                            | 6.8                                 |

**Source/Notes:** SOURCE Procedures codes are from the Clinical Classifications Software. NOTE

Abbreviations: CCS, Clinical Classifications Software.
